# Supplementary material for: An anthraquinone-based conjugated donor–acceptor (D–A) polymer as a highly efficient photocatalyst for hydrogen peroxide production
Source: Royal Society of Chemistry journal article supplement (doi:10.1039/d4ta01248h), 2024-01-01
Supplement: d4ta01248h1.pdf [file d4ta01248h1.pdf]

ARTICLE

## Supporting information

### **Antraquinone-based conjugated donor-acceptor (D-A) polymer as a highly efficient photocatalyst for hydrogen peroxide production**

Ajay V. Munde, Devendra M. Sanke, Nani G. Ghosh, Jasmine Bezboruah, Shiladitya Roy, Sanjio S. Zade\*

a. Department of Chemical Sciences, Centre for Advanced Functional Materials, Indian Institute of Science Education and Research (IISER) Kolkata, Mohanpur, Nadia, 741246, West Bengal, India..

E-mail:

sanjiozade@iiserkol.ac.in

#### Supporting information List

**S-1) Material characterization**

**S-2) Photoelectrochemical measurements**

**S-3) Experimental section**

**S-4) Scanning Electron Microscopy (SEM) and Energy-Dispersive X-Ray (EDX) Spectroscopy of anthraquinone-based conjugated polymer (ACP):**

**S-5) Brunauer–Emmett–Teller (BET) of ACP**

**S-6) Fourier-transform infrared spectroscopy (FT-IR) and X-ray photoelectron spectrum (XPS) full survey of ACP**

**S-7) Hydrogen peroxide (H<sub>2</sub>O<sub>2</sub>) Concentration Measurements**

**S-8) Photoelectrochemical studies of ACP**

**S-9) Solar-to-chemical energy conversion efficiency (SCC) measurement**

**S-10) Proton nuclear magnetic resonance (<sup>1</sup>HNMR)**

**S-11) Photoluminescence spectra of ACP photocatalyst**

**S12) Notes and references**

### S-1) Material characterization

A field-emission scanning electron microscope (FESEM, Zeiss SIGMA 300, and Zeiss SUPRA 55-VP) was used to study the morphology of the anthraquinone-based conjugated polymer (ACP). EDAX analysis, the samples were prepared on Pt and Al films. To obtain crystallographic information on the materials, room-temperature X-ray diffraction (XRD) patterns were recorded primarily using a Rigaku MiniFlex diffractometer having the Cu  $K_{\alpha}$  ( $\lambda=1.54 \text{ \AA}$ ) line as the X-ray source. To record UV-vis absorption spectra of the materials at room temperature, an Agilent Cary 3500 spectrophotometer was used. Transient Absorption Spectroscopy: The femtosecond transient absorption setup is based on a regenerative amplified Ti: sapphire laser system from coherent (800 nm, 35 fs, 6 mJ/pulse, and 1 kHz repetition rate). X-ray photoelectron spectroscopy (XPS) on a SPECS HSA-3500 with a monochromatic Al K $\alpha$  X-ray radiation X-ray source and the hemispherical analyzer were used to investigate the elemental states of the sample. The JEOL JNM-ECS400 spectrometer was used to record the nuclear magnetic resonance (NMR) spectrum.

### S-2) Photoelectrochemical measurements

Photoelectrochemical (PEC) measurements of ACP photoanodes were conducted in a three-electrode system with a potentiostat (CH Instruments, 660D potentiostat) under simulated AM 1.5 G solar light irradiation, where a Newport Xe lamp with a light intensity of  $100 \text{ mW/cm}^2$  was used as the visible-light source. All the photoelectrochemical experiments were performed under visible-light illumination with a light intensity of  $100 \text{ mW/cm}^2$ . In a standard electrochemical cell, Ag/AgCl (saturated in 1 M aq. KCl) was used as the reference electrode, the as-prepared electrodes were utilized as the working electrode, whereas a Pt wire was used as the counter electrode. Photoreactions were carried out by visible-light irradiation ( $\lambda > 420 \text{ nm}$ ) using a xenon lamp with magnetic stirring at 298 K. The catalyst (10 mg) suspended in pure water (10 ml) was used for the photoreaction. The suspension of the catalyst was purged with oxygen for 45 minutes. The  $\text{H}_2\text{O}_2$  concentration was measured by using iodometric titration. The concentration was standardized with the commercial  $\text{H}_2\text{O}_2$  sample, as shown in section S8. The Nyquist plot was obtained using the electrochemical impedance spectroscopy (EIS) technique, measured within the 100-1000 Hz frequency range at  $E = 0 \text{ V}_{\text{Ag/AgCl}}$  using DC voltage with an introduction of 5 mV under illuminated conditions. The linear sweep voltammetry (LSV) measurements were carried out at a  $50 \text{ mV/s}$  scan rate. An aqueous electrolyte containing aq.  $0.5 \text{ M Na}_2\text{SO}_4$  ( $\text{pH} \sim 7$ ) was used. To convert the potential values ( $V_{\text{Ag/AgCl}}$ ) measured against the Ag/AgCl reference electrode into potential values ( $V_{\text{RHE}}$ ) against the reversible hydrogen electrode (RHE), the following equation (1) is employed, where  $V_{\text{Ag/AgCl}}^0 = 0.1976 \text{ V}$  at 298 K in saturated KCl.

$$V_{\text{RHE}} = V_{\text{Ag/AgCl}} + 0.059 \times \text{pH} + V_{\text{Ag/AgCl}}^0$$

### Electron spin resonance (ESR) measurement

Electron spin resonance (ESR) measurements were performed using an ESR spectrometer (Bruker EMX MICRO X spectrometer). 5,5-dimethyl-1-pyrroline N-oxide (DMPO) was used as a spin-trapping reagent to detect radicals. The measurements were carried out in an  $\text{H}_2\text{O}$ /Isopropanol (1:9, 500  $\mu\text{L}$ ), mixture with 2 mg catalyst and 0.1 mmol DMPO within a glass tube (capacity, 4 mL), and the tube was sealed with a rubber septum cap. After ultrasonication (5 min.) and  $\text{O}_2$  bubbling (10 min.), a Xe lamp with a filter ( $\lambda > 420 \text{ nm}$ ) was applied as the light source.

### Rotating disk electrode (RDE) measurements,

The electron transfer number for the oxygen reduction reaction was measured on a rotating disk electrode (RDE) in  $\text{O}_2$  saturated  $0.5 \text{ M Na}_2\text{SO}_4$  ( $\text{pH} \sim 7$ ) solution at room temperature at different rotating speeds after  $\text{O}_2$  bubbling for 40 min. The electron transfer number for the oxygen reduction reaction is calculated by the following equation

$$\frac{i}{1} = \frac{1}{JL} + \frac{1}{JK} = \frac{1}{B\omega^{1/2}} + \frac{1}{JK}$$

Where  $i$  is the current intensity,  $J^L$  and  $J^k$  are the kinetic and diffusion-limiting current densities,  $\omega$  is the angular velocity,  $n$  is the transferred electron number,  $F$  is Faraday constant ( $96485 \text{ C mol}^{-1}$ ),  $\nu$  is the kinetic viscosity of water ( $0.01 \text{ cm}^2 \text{ s}^{-1}$ ),  $C$  is the bulk concentration of  $\text{O}_2$  in water ( $1.26 \times 10^{-3} \text{ mol cm}^{-3}$ ), and  $D$  is the diffusion coefficient of  $\text{O}_2$  ( $2.7 \times 10^{-5} \text{ cm}^2 \text{ s}^{-1}$ ).  $B = 0.2nFV^{-1/6} CD^{2/3}$

### S-3) Experimental Section

Material: Benzoquinone, isoprene, hydroquinone, absolute ethanol (EtOH), potassium hydroxide (KOH), sulfuryl chloride ( $\text{SO}_2\text{Cl}_2$ ), Azobisisobutyronitrile (AIBN), phenol, resorcinol, phloroglucinol, 2-amino phenol, water, potassium iodide (KI), Isopropyl alcohol, Sodium nitrate ( $\text{NaNO}_3$ ) were of analytical grade and used without extra purification as received. The polymers were synthesized using deionized (DI) water.

#### S-3.1) Synthesis of 2,6-dimethyl-9,10-anthraquinone (3)

2,6-Dimethyl-9,10-anthraquinone (3) was synthesized from 1,4-benzoquinone (1) and isoprene (2) using the reported procedure.<sup>1</sup> Benzoquinone (2g, 18.51 mmol), isoprene (5.56 mL), and a small amount of hydroquinone (410 mg) were added to 20 mL absolute ethanol in a 50 mL tube. The reaction tube was sealed and then heated at  $130 \text{ }^\circ\text{C}$  for 8 hours; After 8 hours, the reaction tube was cooled at room temperature, and the entire mixture was transferred and dissolved in ethanolic KOH solution in a round-bottom

flask. The mixture was stirred for the next 10 hours at 40 °C in the presence of air, allowed to cool to room temperature, and then vacuum-filtered to obtain a creamy white solid. This solid was soaked in 100% ethanol and kept in the refrigerator overnight. The solid filter was once more washed with ethanol and water, and dried in the air.

$^1\text{H NMR}$  (500 MHz,  $\text{CDCl}_3$ )  $\delta$  8.20 (d,  $J = 7.9$  Hz, 2H), 8.10 (s, 2H), 7.58 (d,  $J = 7.9$  Hz, 2H), 2.53 (s, 6H).

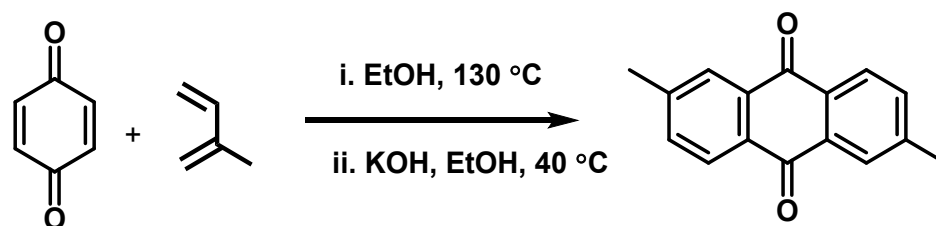

Scheme S1 Synthesis of 2,6-dimethyl-9,10-anthraquinone.

### S-3.2) Synthesis of 2,6-bis(chloromethyl)anthraquinone

2,6-Dimethylanthraquinone (3) (3.8 g, 16.09 mmol), sulfuryl chloride ( $\text{SO}_2\text{Cl}_2$ , 50mL), and 2,20-azobis (2-methylpropionitrile) (0.16 g, 0.96 mmol) were added to the round-bottom flask and refluxed for 24 hours. Excess  $\text{SO}_2\text{Cl}_2$  was removed by vacuum distillation to obtain a milky white solid (Scheme S2).<sup>2</sup> The white solid was filtered and dried, washed multiple times with petroleum ether, and recrystallized from DMF to obtain 3.8 g (78%) of 2,6-bis(chloromethyl)anthraquinone (4).

$^1\text{H NMR}$  (500 MHz,  $\text{CDCl}_3$ )  $\delta$  8.33 (m, 4H), 7.85 (d,  $J = 7.7$  Hz, 2H), 4.72 (s, 4H).

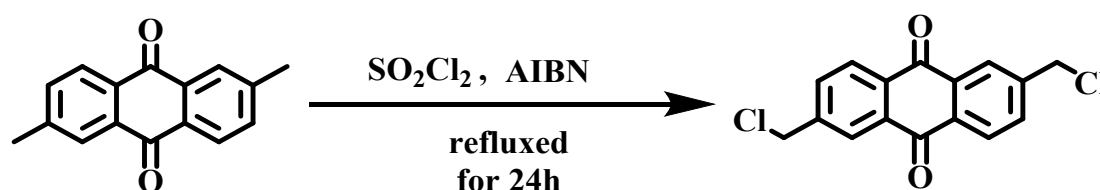

Scheme S2 Synthesis of 2,6 bis chloromethyl anthraquinone.

### S-3.3) Synthesis of anthraquinone-based conjugated polymer (ACP)

The synthesis of anthraquinone-based conjugated polymer (ACP) is achieved by hydrothermal treatment of resorcinol and 2,6-bis(chloromethyl)anthraquinone. Resorcinol (1 mmol) and 2,6-bis(chloromethyl)anthraquinone (1 mmol) (the mole ratio is 1/1) was added to 8 mL of water and 8 mL ethanol containing  $\text{NH}_3$  (200  $\mu\text{L}$ ) as a base catalyst, and the mixture was stirred for 5 min. The colloidal suspension was transferred into a stainless steel autoclave with Teflon lining and placed in an oven for 24 hours at 180 °C for hydrothermal treatment, as shown in Scheme 1. The solution was allowed to cool after the reaction was completed. It was filtered by vacuum filtration and washed with ethanol and water. The precipitate was further dried in the air to give brown powder with a 90% yield. Finally, the synthesized photocatalyst was thoroughly characterized and utilized for the photocatalytic generation of  $\text{H}_2\text{O}_2$ . Similarly, different ACP analogs were synthesized using various phenol derivatives such as phenol, phloroglucinol, and 3-aminophenol.

### S-3.4) Synthesis mechanism of anthraquinone-based conjugated polymer (ACP).

In the presence of ammonia, resorcinolate anions (1) are formed, which react with 2,6-bis(chloromethyl)anthraquinone (2). The reaction can proceed with two pathways with the resonance structure of resorcinolate. Firstly, resorcinolate anion can react through its C-centered nucleophilic site to form a methylene linker which on high-temperature hydrothermal process affords methine linkage. This effectively forms an anthraquinone- $\pi$ -conjugated benzenoid-quinoid D-A couple.<sup>3</sup> Further, nucleophilic attack of the resorcinolate ion on the highly electrophilic quinone methides leads to methylene-bridge formation (ii). The resorcinolate anion can also react through an O-centered nucleophilic site with 2,6-bis(chloromethyl) anthraquinone to create methylene ether linkages. Thus, polycondensation reaction results in crosslinked polymers with extensive quinoid and aromatic forms of resorcinol coupled with anthraquinone units.<sup>3,5</sup>

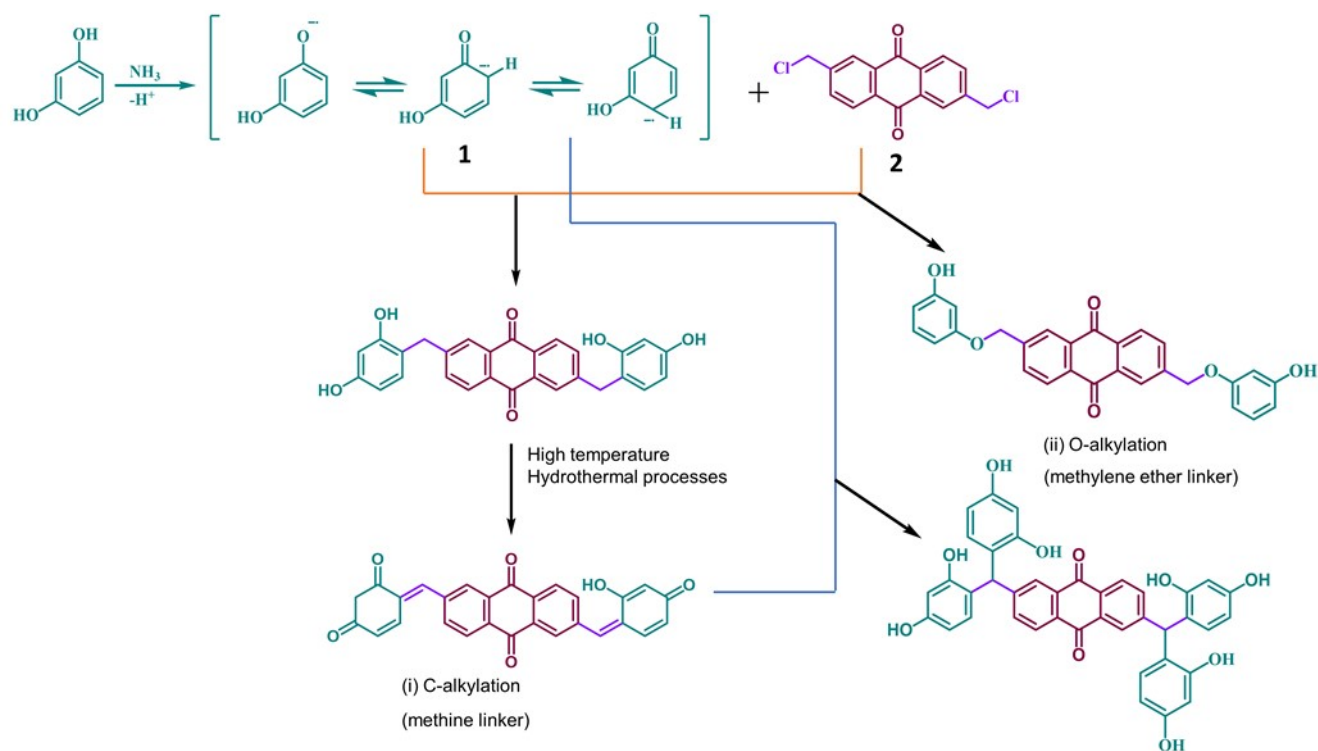

Scheme S3 Mechanism of various pathways that lead to the polycondensation to form ACP.

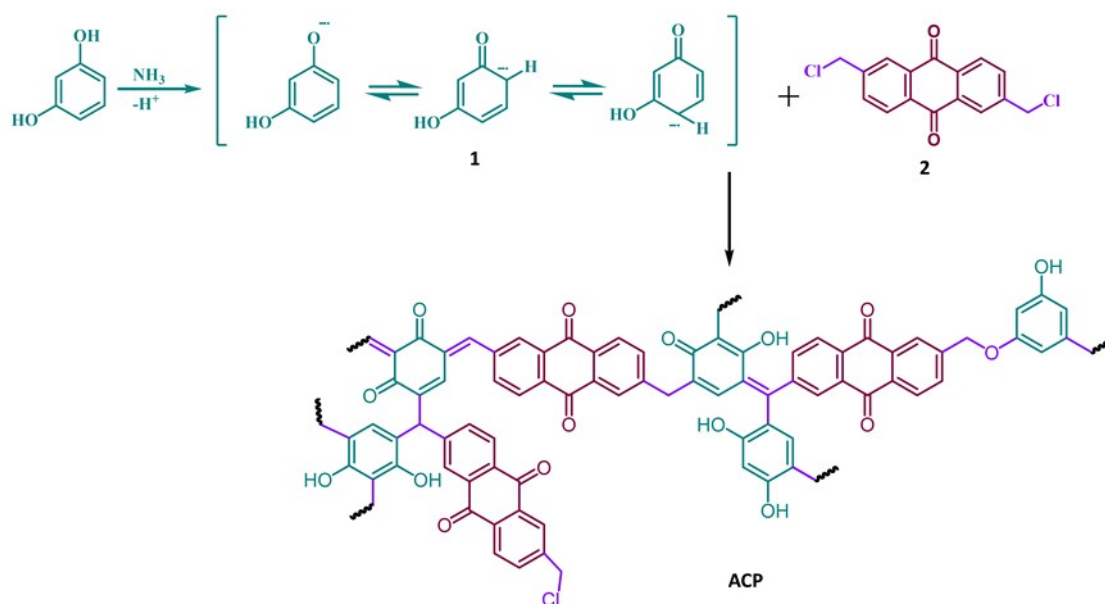

Scheme S4 Synthesis of anthraquinone-based conjugated polymer (ACP); the plausible structure of the ACP is derived from the summation of pathways shown in Scheme S3.

## S-4) SEM-EDAX of ACP

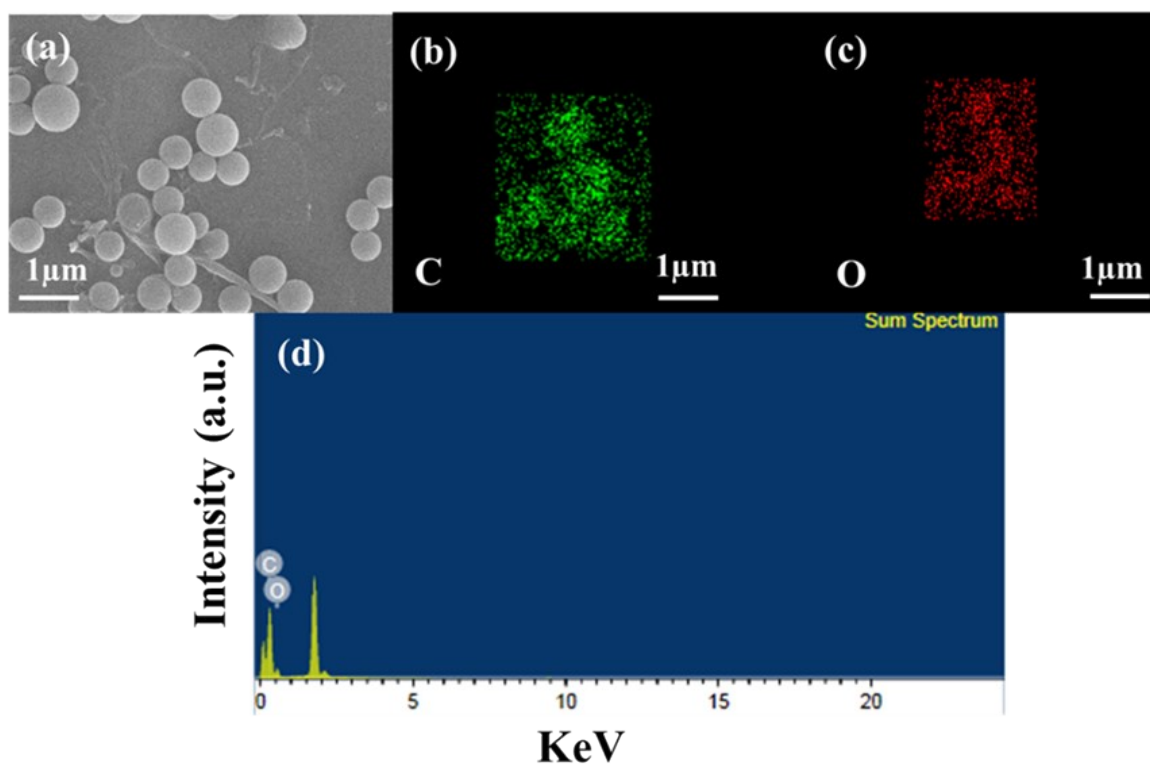

Figure S1. EDAX image of ACP (a) and distribution of carbon, oxygen, (b), (c) and EDAX spectra of ACP (d).

## S-5) Brunauer–Emmett–Teller (BET) of ACP

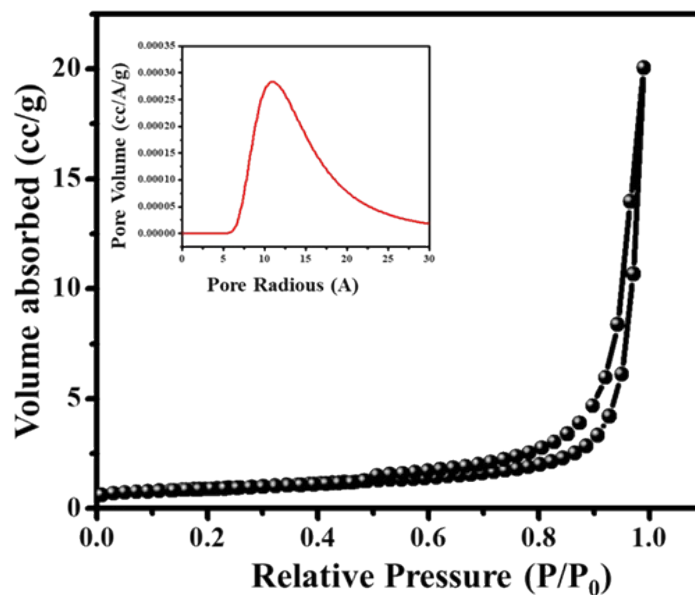

Figure S2 Superimposed BET  $N_2$ -adsorption-desorption surface area analysis of ACP is  $48 \text{ m}^2/\text{g}$ .

## S-6) Fourier-transform infrared spectroscopy (FT-IR) of ACP

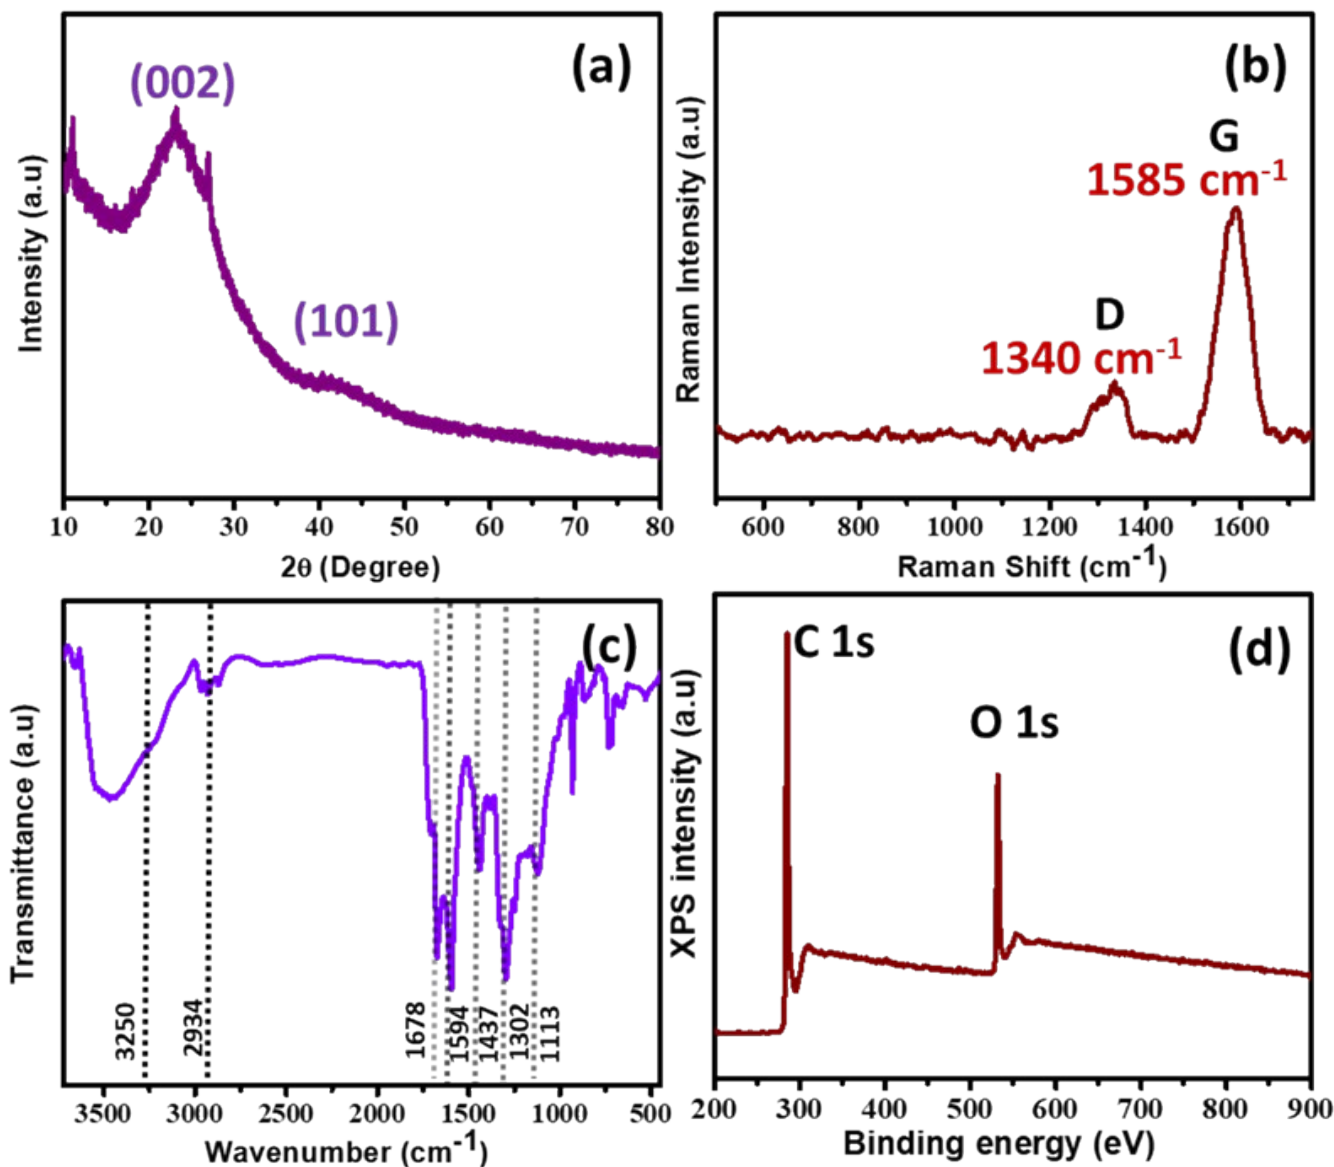

Figure S3 (a) XRD pattern, (b) Raman spectra, and (c) FT-IR of ACP. Characteristics peaks:  $3250\text{ cm}^{-1}$  (O-H of resorcinol fragment),  $2934\text{ cm}^{-1}$  (C-H of methylene linker),  $1678\text{ cm}^{-1}$  (C=O of anthraquinone),  $1610\text{ cm}^{-1}$  (C=C of aromatic ring),  $1450\text{ cm}^{-1}$  (C=C methylene linker),  $1290\text{ cm}^{-1}$  (C-H in an aromatic ring),  $1050\text{ cm}^{-1}$  (C-O of resorcinol). (d) XPS full survey of ACP.

Table S1 Elemental analysis of atomic (%) of C and O in the polymeric compound by using EDAX and XPS.

| Sr. No. | Elements | EDAX atomic (%) | XPS atomic (%) |
|---------|----------|-----------------|----------------|
| 1       | C        | 79.50           | 80.10          |
| 2       | O        | 20.50           | 19.90          |

### S-7) H<sub>2</sub>O<sub>2</sub> concentration measurements by using the UV-vis absorption spectrometry (Iodometric Titration)

Typically, 100ml aq. 0.0029 M ammonium molybdate ((NH<sub>4</sub>)<sub>2</sub>MoO<sub>4</sub>) solution containing 1.5 ml H<sub>2</sub>SO<sub>4</sub> were prepared in advance. A sample aliquot of 0.5 mL and 1.5 mL of ((NH<sub>4</sub>)<sub>2</sub>MoO<sub>4</sub>) solution was mixed with 40 mg of potassium iodide (KI) before measuring. This give absorbance at 352 nm (Figure S4) corresponds to I<sub>3</sub><sup>-</sup>. The formation of I<sub>3</sub><sup>-</sup> is given in the reaction below.

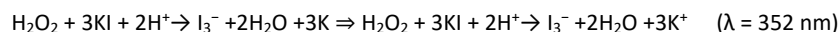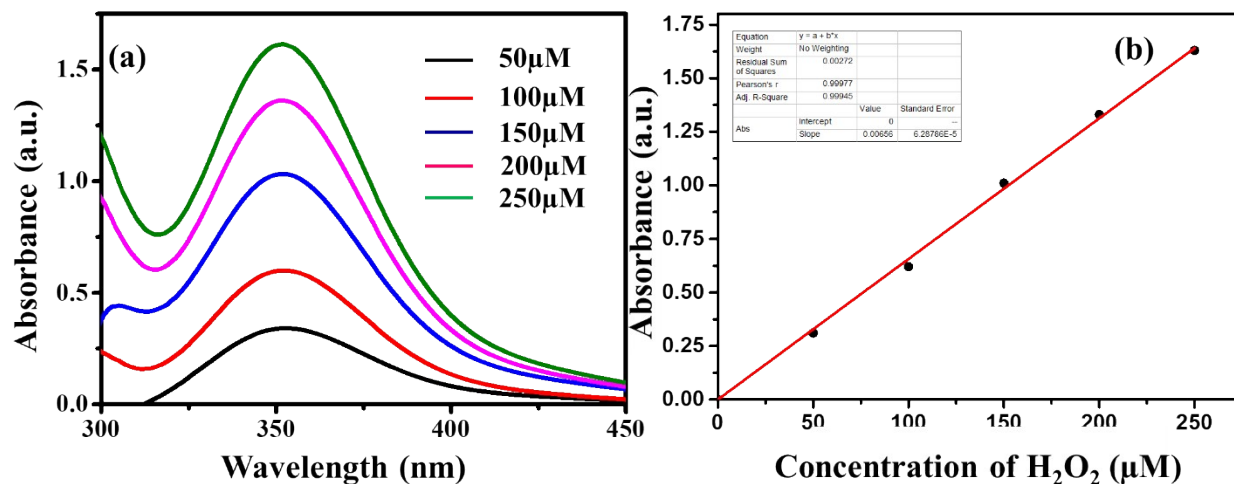

Figure S4 (a) Standard curves for different concentrations of H<sub>2</sub>O<sub>2</sub> and (b) the linear relationship of concentration of H<sub>2</sub>O<sub>2</sub> vs. UV-vis absorption intensity.

### S-8) Photoelectrochemical studies of ACP

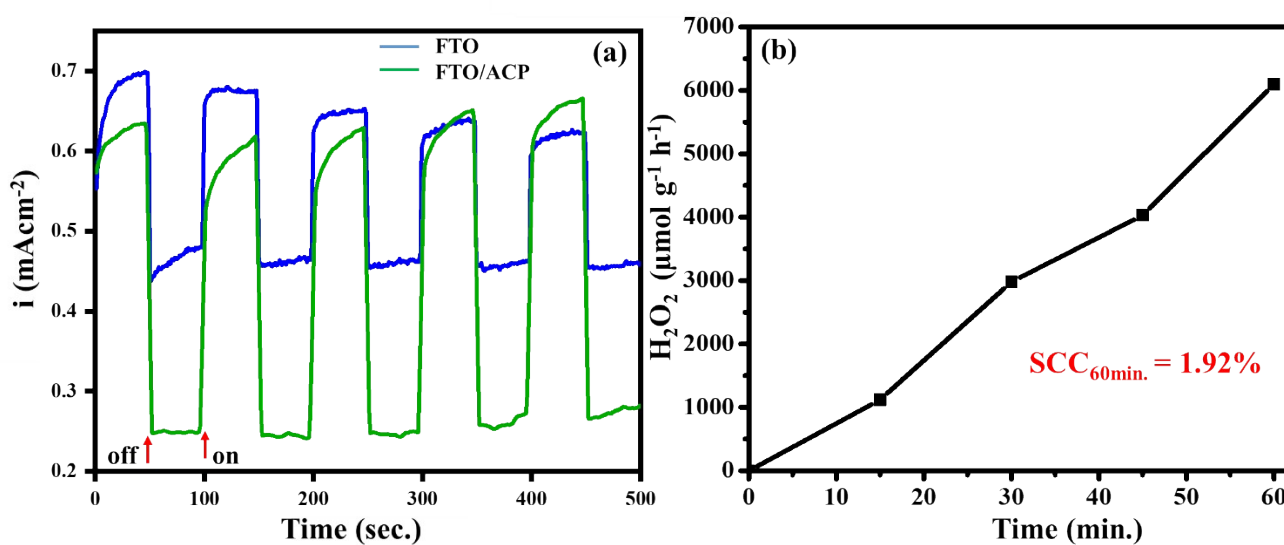

Figure S5 (a) The photo-current properties by light-on/off for FTO and ACP/FTO. (b) The photocatalytic yield of H<sub>2</sub>O<sub>2</sub> and SCC efficiency of ACP in 60 min.

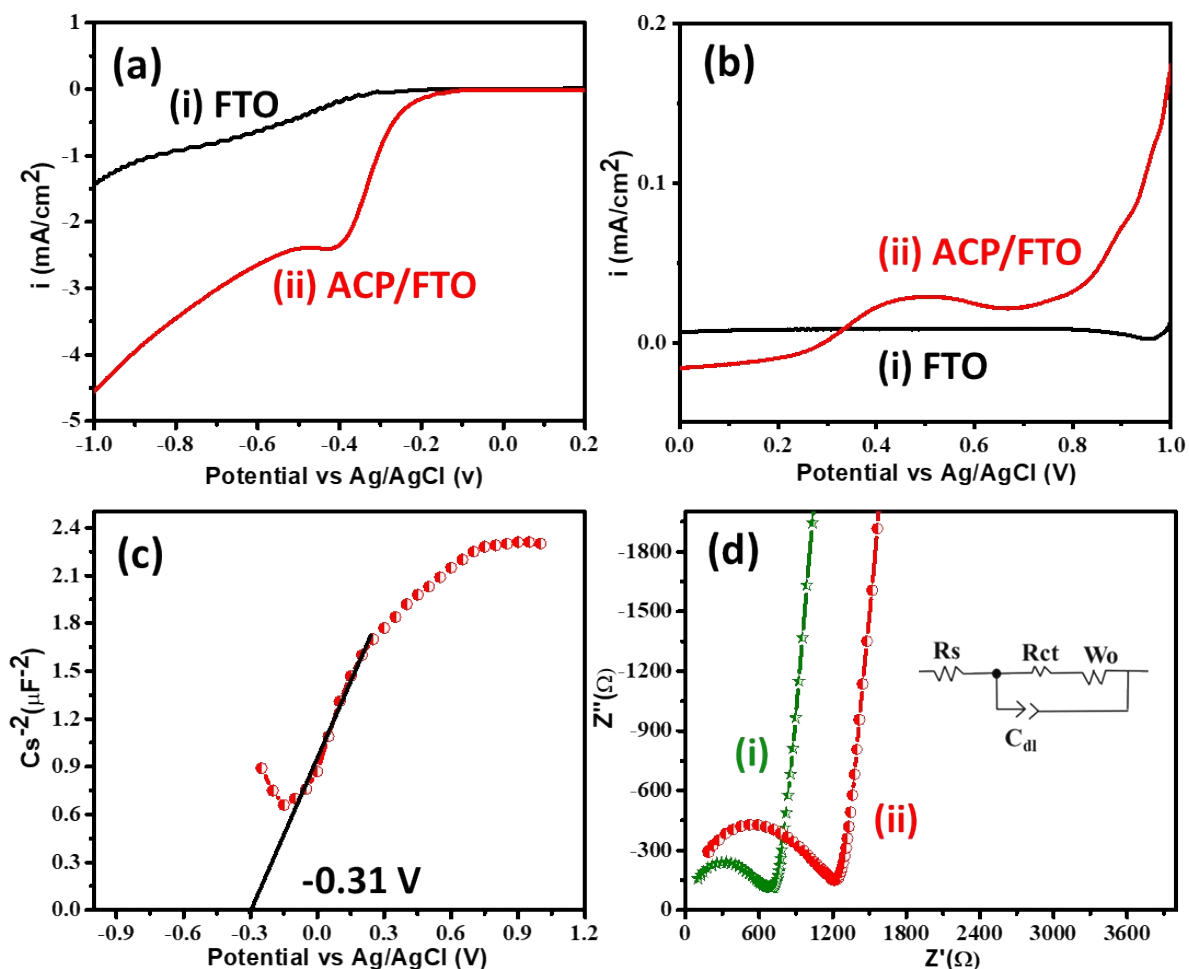

Figure S6 (a) and (b) LSV of FTO, ACP/FTO in 0.5 Na<sub>2</sub>SO<sub>4</sub> solutions at a scan rate of 50 mV/s, (c) Mott-Schottky plots in 0.5 Na<sub>2</sub>SO<sub>4</sub> solutions ( $E = 0$  V), (d) electrochemical impedance spectroscopy (EIS) for (i) ACP/FTO in the light, (ii) ACP/FTO in dark at  $E = 0$  V<sub>Ag/AgCl</sub> in the frequency range of 100-1000 Hz.

### Rotating disk electrode (RDE) measurements

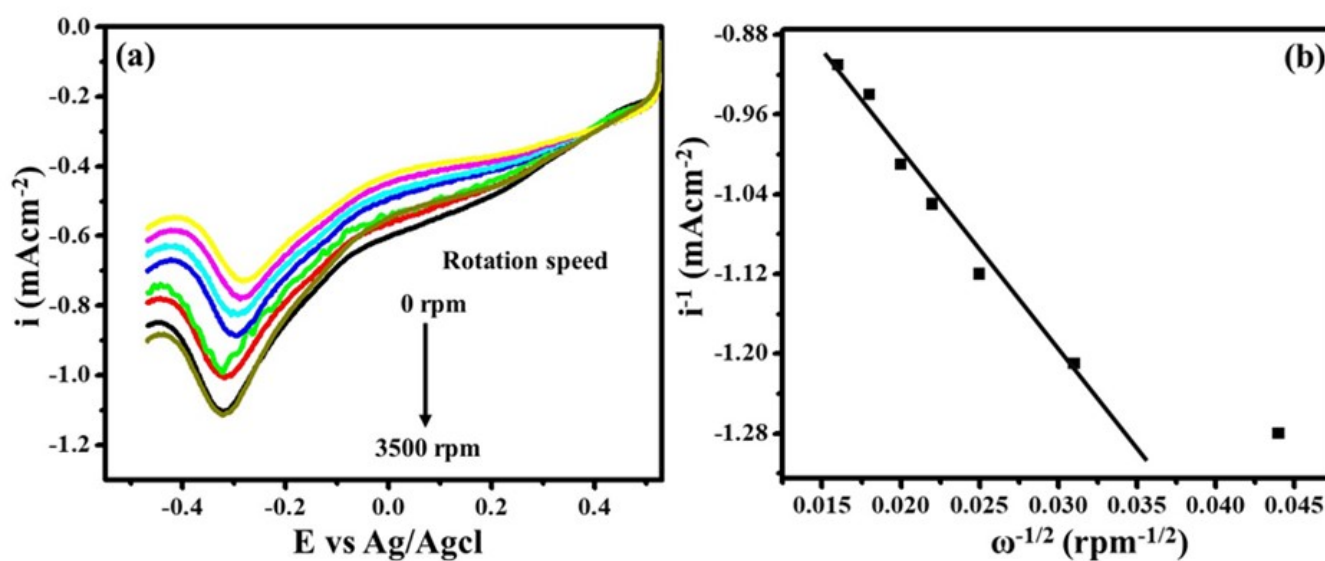

Figure S7 (a) LSV curve of ACP in 0.5 Na<sub>2</sub>SO<sub>4</sub> solutions at different rotation speeds (0, 500, 1000, 1500, 2000, 2500, 3000, 3500 rpm) using rotating disc electrode, and (b) Koutecky-Levich plots of ACP.



### S-9) SCC Efficiency measurement

To calculate the solar-to-chemical energy conversion (SCC) efficiency, an LED solar simulator was used as the light source (100 mW cm<sup>-2</sup>). 10 mg catalysts and 10 mL water were added into a round bottom flask and bubbled with O<sub>2</sub> for 45 minutes; the reaction was carried out at 40 °C in a water bath. The SCC efficiency was calculated via the following equation,

$$SCC \text{ efficiency (\%)} = \frac{[\Delta G \text{ for H}_2\text{O}_2 \text{ generation (J mol}^{-1}\text{)}][\text{H}_2\text{O}_2 \text{ produced (mol)}]}{[\text{total input energy (W)}] [\text{reaction time (s)}]} \times 100$$

where the free energy ( $\Delta G$ ) for H<sub>2</sub>O<sub>2</sub> formation is 117000 J mol<sup>-1</sup>, and the irradiated area is 1000 W/m<sup>2</sup> and the irradiated area is 3.14 × 10<sup>-4</sup> m<sup>2</sup>. The total input energy was therefore 9.6 W.

**Table S2** Rate of photocatalytic H<sub>2</sub>O<sub>2</sub> generation with the polymers produced with various phenolic derivatives

| Sr. No. | phenol derivatives | Structure                                                                           | H <sub>2</sub> O <sub>2</sub> (μmol) <sup>a</sup> |
|---------|--------------------|-------------------------------------------------------------------------------------|---------------------------------------------------|
| 1       | phenol             | 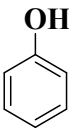   | 1500 μmol g <sup>-1</sup>                         |
| 2       | Resorcinol         |    | 12576 μmol g <sup>-1</sup>                        |
| 3       | Phloroglucinol     |   | 3500 μmol g <sup>-1</sup>                         |
| 4       | 3-Aminophenol      |  | 2100 μmol g <sup>-1</sup>                         |

<sup>a</sup> Reaction conditions: water (10mL), catalyst (10 mg), λ > 420 nm light intensity at 420-700 nm, photoirradiation time (3h).

**Table S3** Comparison of the photocatalytic H<sub>2</sub>O<sub>2</sub> production activity of ACP with previously reported organic materials

| Sr. No. | Catalysts                            | Solvent                              | Light source | Yield of H <sub>2</sub> O <sub>2</sub> (μmol g <sup>-1</sup> h <sup>-1</sup> ) | SCC efficiency (% h <sup>-1</sup> ) | Ref. |
|---------|--------------------------------------|--------------------------------------|--------------|--------------------------------------------------------------------------------|-------------------------------------|------|
| 1)      | RF523                                | H <sub>2</sub> O                     | λ > 420 nm   | 460                                                                            | 0.5                                 | 3    |
| 2)      | G-C <sub>3</sub> N <sub>4</sub> -PDI | H <sub>2</sub> O                     | λ > 420 nm   | 21.1                                                                           | -                                   | 4    |
| 3)      | RF-acid resins                       | H <sub>2</sub> O                     | λ > 420 nm   | 400                                                                            | 0.7                                 | 5    |
| 4)      | (i) TPE-AQ<br>(ii) TPE-AC            | H <sub>2</sub> O<br>H <sub>2</sub> O | λ > 420 nm   | 909<br>293                                                                     |                                     | 6    |
| 5)      | DE7-M                                | H <sub>2</sub> O                     | λ > 420 nm   | 2216                                                                           | 0.23                                | 7    |
| 6)      | CNP-S                                | H <sub>2</sub> O                     | λ > 420 nm   | 3200                                                                           |                                     | 8    |
| 7)      | CHF-DPDA                             | H <sub>2</sub> O                     | λ > 420 nm   | 1725                                                                           | 0.78                                | 9    |
| 8)      | PM-CDs-30                            | H <sub>2</sub> O                     | λ > 420 nm   | 1340                                                                           | 0.21                                | 10   |
| 9)      | ZIF-8/C <sub>3</sub> N <sub>4</sub>  | H <sub>2</sub> O                     | λ > 420 nm   | 2641                                                                           | 0.58                                | 11   |

|     |           |                  |                    |      |      |           |
|-----|-----------|------------------|--------------------|------|------|-----------|
| 10) | AQTEE-COP | H <sub>2</sub> O | $\lambda > 420$ nm | 3204 | -    | 12        |
| 11) | NMT400    | H <sub>2</sub> O | $\lambda > 420$ nm | 1695 | -    | 13        |
| 12) | PQTEE-COP | H <sub>2</sub> O | $\lambda > 420$ nm | 3009 | -    | 14        |
| 13) | RF-DHAQ   | H <sub>2</sub> O | $\lambda > 420$ nm | 1820 | 1.12 | 15        |
| 14) | ACP       | H <sub>2</sub> O | $\lambda > 420$ nm | 6097 | 1.92 | This work |

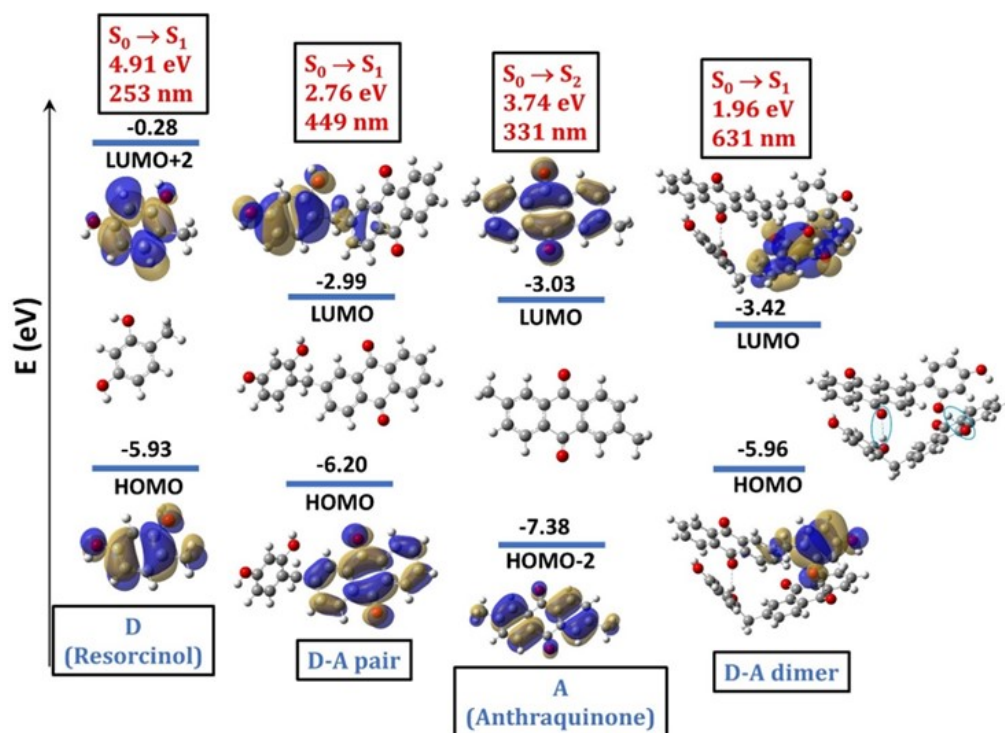

Figure S8 Frontier molecular orbitals of model compounds for donor (resorcinol), acceptor (anthraquinone), donor-acceptor pair and its dimer and their relative energies calculated using DFT-D3 at B3LYP/6-31+G(d).

### S-10) <sup>1</sup>H NMR

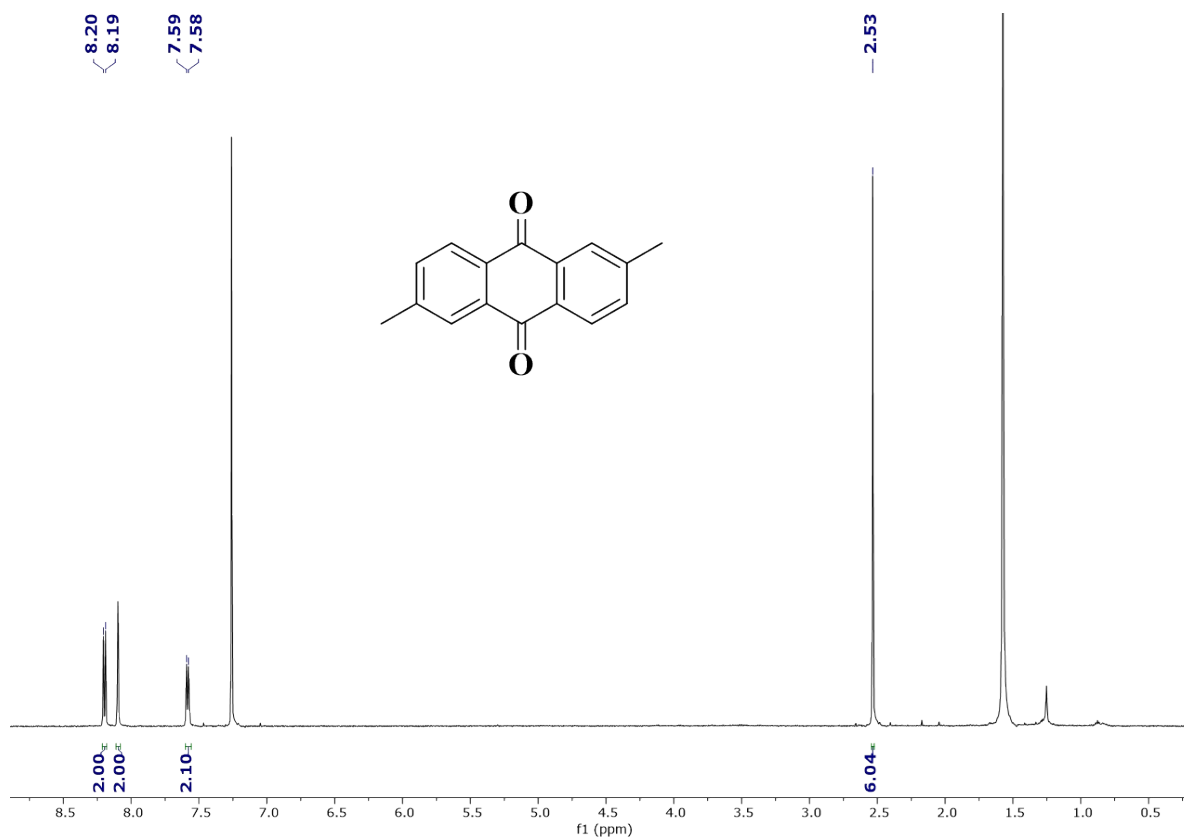Figure S9 <sup>1</sup>H NMR of 2,6-dimethyl-9,10-anthraquinone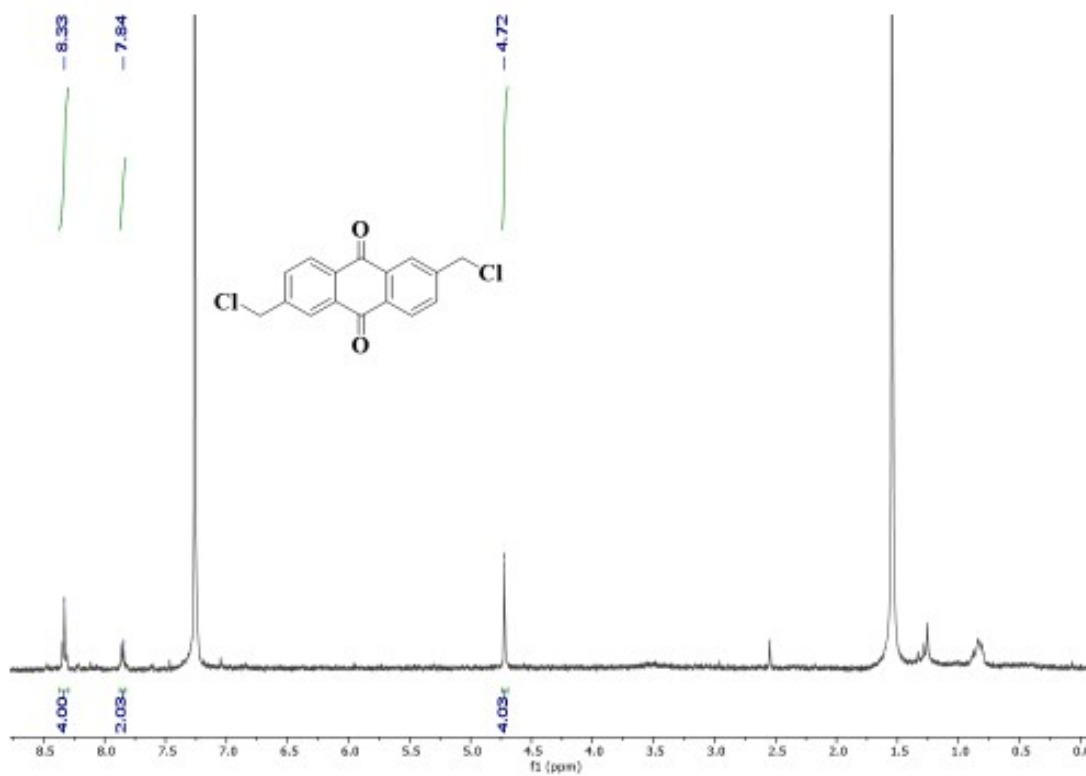Figure S10 <sup>1</sup>H NMR of 2,6-bis(chloromethyl) anthraquinone.

## S-11) Photoluminescence spectra of ACP photocatalyst :

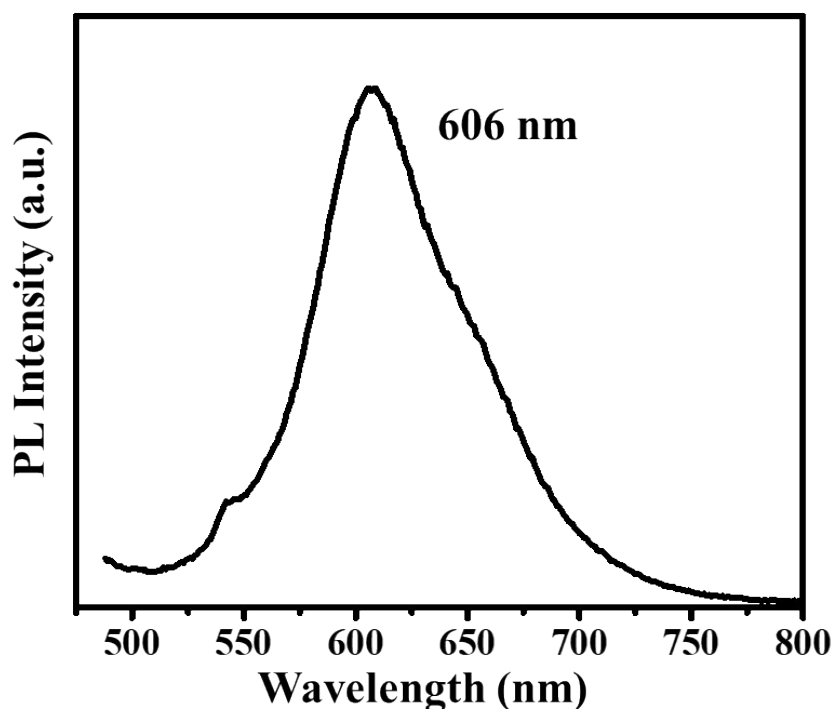

Figure S11 Steady state photoluminescence spectra of ACP photocatalyst

To investigate anthraquinone redox centre advantages. In centres with donor-acceptor semiconductors combined, the steady-state photoluminescence (PL) spectra of ACP have been examined for photoinduced charge separation and transfer to photocatalytic  $\text{H}_2\text{O}_2$  production. As shown in Figure S12 ACP releases light centered at 606 nm with 490 nm excitation. The PL result of ACP suggested that an enhancement in the hole-electron separation efficiency towards the  $\text{H}_2\text{O}_2$  production.

Table S4. The major electronic transitions, related oscillator strength, and orbitals' contributions for the low-lying singlet states of model compounds were calculated from the TD-DFT method at B3LYP/6-31+G(d). The lowest energy transitions are marked in red font

| Compound                                                                            | Transitions           | Orbital contribution                                 | E (eV), ( $\lambda$ ) (nm) | Oscillator strength (f) |
|-------------------------------------------------------------------------------------|-----------------------|------------------------------------------------------|----------------------------|-------------------------|
| 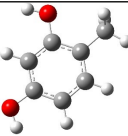 | $S_0 \rightarrow S_1$ | H $\rightarrow$ L (80%)<br>H-1 $\rightarrow$ L (20%) | 4.91 eV<br>252 nm          | 0.0429                  |
|  | $S_0 \rightarrow S_2$ | H-2 $\rightarrow$ L (99%)                            | 3.6 eV<br>346 nm           | 0.0031                  |
|                                                                                     | $S_0 \rightarrow S_3$ | H $\rightarrow$ L (93%)                              | 4.37 eV<br>284 nm          | 0.4719                  |
|  | $S_0 \rightarrow S_3$ | H $\rightarrow$ L (97%)                              | 3.49 eV<br>355 nm          | 0.0062                  |
|                                                                                     | $S_0 \rightarrow S_6$ | H $\rightarrow$ L+1 (79%)                            | 4.25 eV<br>292 nm          | 0.2007                  |

|  |                       |                                                            |                   |        |
|--|-----------------------|------------------------------------------------------------|-------------------|--------|
|  | $S_0 \rightarrow S_4$ | H-2 $\rightarrow$ L (79%)<br>H-5 $\rightarrow$ L (14%)     | 3.74 eV<br>331 nm | 0.1445 |
|  | $S_0 \rightarrow S_4$ | H-2 $\rightarrow$ L (15%)<br>H-5 $\rightarrow$ L (78%)     | 4.23 eV<br>288 nm | 0.1624 |
|  | $S_0 \rightarrow S_1$ | H $\rightarrow$ L (61%)<br>H-2 $\rightarrow$ L (30%)       | 2.85 eV<br>434 nm | 0.1591 |
|  | $S_0 \rightarrow S_2$ | H $\rightarrow$ L (33%)<br>H-2 $\rightarrow$ L (56%)       | 2.92 eV<br>425 nm | 0.1069 |
|  | $S_0 \rightarrow S_1$ | H-1 $\rightarrow$ L (66%)<br>H-1 $\rightarrow$ L+1 (28%)   | 2.64 eV<br>471 nm | 0.0028 |
|  | $S_0 \rightarrow S_2$ | H $\rightarrow$ L (73%)<br>H-3 $\rightarrow$ L (14%)       | 2.84 eV<br>436 nm | 0.1950 |
|  | $S_0 \rightarrow S_1$ | H $\rightarrow$ L (61%)<br>H-2 $\rightarrow$ L (30%)       | 2.85 eV<br>434 nm | 0.1591 |
|  | $S_0 \rightarrow S_2$ | H $\rightarrow$ L (33%)<br>H-2 $\rightarrow$ L (56%)       | 2.92 eV<br>425 nm | 0.1069 |
|  | $S_0 \rightarrow S_1$ | H $\rightarrow$ L (99%)                                    | 1.96 eV<br>631 nm | 0.0004 |
|  | $S_0 \rightarrow S_3$ | H-1 $\rightarrow$ L (99%)                                  | 2.13 eV<br>583 nm | 0.0113 |
|  | $S_0 \rightarrow S_6$ | H-3 $\rightarrow$ L+1 (69%)<br>H-2 $\rightarrow$ L+1 (30%) | 2.69 eV<br>461 nm | 0.0182 |
|  | $S_0 \rightarrow S_1$ | H $\rightarrow$ L (97%)                                    | 2.15 eV<br>578 nm | 0.0017 |
|  | $S_0 \rightarrow S_2$ | H-1 $\rightarrow$ L (45%)<br>H $\rightarrow$ L+1 (54%)     | 2.35 eV<br>529 nm | 0.0253 |
|  | $S_0 \rightarrow S_3$ | H-1 $\rightarrow$ L (52%)<br>H $\rightarrow$ L+1 (44%)     | 2.52 eV<br>491 nm | 0.1568 |

Coordinates of model compounds and their structures

(a) Donor (an aromatic form of resorcinol derivative)

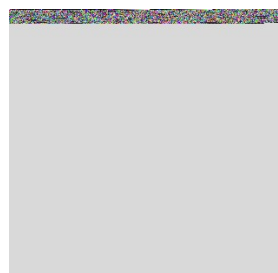

|   |             |             |             |
|---|-------------|-------------|-------------|
| C | 2.61809000  | -0.83175800 | -0.00002900 |
| H | 3.10722800  | -0.39364300 | -0.87895700 |
| H | 2.81151400  | -1.90969000 | -0.00110700 |
| C | 1.13615700  | -0.55168400 | -0.00006300 |
| C | 0.17494900  | -1.56404700 | -0.00007900 |
| C | 0.66634600  | 0.77579100  | 0.00002500  |
| C | -1.19893700 | -1.29543100 | -0.00003900 |

|   |             |             |             |
|---|-------------|-------------|-------------|
| H | 0.50729800  | -2.59982200 | -0.00014400 |
| C | -0.69669800 | 1.07381700  | 0.00004400  |
| C | -1.62973800 | 0.03283800  | 0.00001600  |
| H | -1.91982000 | -2.11038700 | -0.00011600 |
| H | -1.05123400 | 2.10182300  | 0.00007200  |
| O | 1.62141300  | 1.76262000  | 0.00003000  |
| H | 1.19631900  | 2.63396800  | 0.00016700  |
| O | -2.95507500 | 0.39225000  | -0.00000500 |
| H | -3.50987200 | -0.40285200 | 0.00057800  |
| H | 3.10684000  | -0.39551200 | 0.88006200  |

## (b) Donor (Quinoidal form of resorcinol)

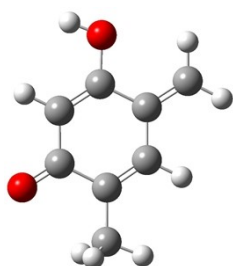

|   |             |             |             |
|---|-------------|-------------|-------------|
| C | -2.25681800 | 1.64239800  | 0.00002100  |
| H | -3.26436100 | 1.24188500  | 0.00011400  |
| C | -1.17172200 | 0.83626100  | 0.00003100  |
| C | 0.18738800  | 1.37442100  | -0.00007600 |
| C | -1.30137900 | -0.62755500 | 0.00015900  |
| C | 1.29673400  | 0.60264900  | -0.00008300 |
| H | 0.27841600  | 2.45945500  | -0.00016300 |
| C | -0.20905100 | -1.42963900 | 0.00013200  |
| C | 1.15002700  | -0.88279900 | -0.00002800 |
| H | -0.29170500 | -2.51406900 | 0.00020100  |
| O | -2.58300800 | -1.08680600 | 0.00002300  |
| O | 2.14145100  | -1.61945600 | 0.00004000  |
| C | 2.69553400  | 1.14713200  | -0.00018000 |
| H | 3.24873700  | 0.78906400  | 0.87611300  |
| H | 3.24866600  | 0.78893500  | -0.87646500 |
| H | 2.69745400  | 2.24196800  | -0.00025800 |
| H | -2.14453300 | 2.72318400  | -0.00006400 |
| H | -2.58451500 | -2.05753700 | 0.00014800  |

## (b) Donor/Acceptor (Biquinoidal form of resorcinol)

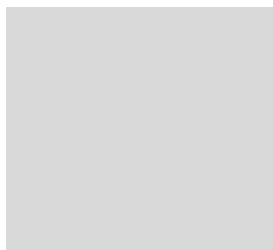

|   |             |             |             |
|---|-------------|-------------|-------------|
| C | 2.22755600  | -1.96571900 | 0.00009500  |
| H | 3.24117600  | -1.57754400 | 0.00003300  |
| C | 1.17424500  | -1.12275600 | -0.00010100 |
| C | -0.20220200 | -1.60130000 | -0.00010500 |
| C | 1.42442700  | 0.36009000  | -0.00046100 |
| C | -1.30641300 | -0.81497700 | -0.00004100 |
| H | -0.33172700 | -2.68342800 | -0.00017200 |
| C | 0.21596700  | 1.24566000  | 0.00013100  |
| C | -1.16889500 | 0.66071600  | 0.00027100  |
| O | 2.56034700  | 0.81891700  | -0.00020400 |
| O | -2.16371800 | 1.38356800  | -0.00020300 |
| C | -2.70608000 | -1.36062400 | -0.00009900 |
| H | -3.25947400 | -1.00388600 | 0.87661200  |
| H | -3.25974400 | -1.00303000 | -0.87628300 |
| H | -2.70712300 | -2.45512500 | -0.00061400 |
| H | 2.09114000  | -3.04405700 | 0.00029400  |
| C | 0.37191600  | 2.58153000  | 0.00060800  |
| H | 1.36613200  | 3.01810200  | 0.00056600  |
| H | -0.49653200 | 3.23336600  | 0.00103900  |

## (d) Acceptor (anthraquinone)

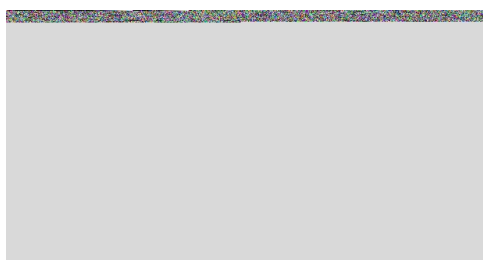

|   |             |             |             |
|---|-------------|-------------|-------------|
| C | -2.68598600 | 0.97684900  | 0.00034200  |
| C | -3.78182700 | 0.10979000  | 0.00021300  |
| C | -3.53563000 | -1.27630900 | 0.00009600  |
| C | -2.23789900 | -1.77625400 | 0.00002500  |
| C | 2.68598700  | -0.97684400 | -0.00051200 |
| C | 3.78183000  | -0.10978400 | -0.00069200 |
| C | 3.53563300  | 1.27631200  | -0.00076700 |
| C | 2.23790000  | 1.77625800  | -0.00029800 |
| C | -0.23859400 | 1.45897500  | 0.00044100  |
| C | 0.23859600  | -1.45897000 | 0.00009800  |
| C | -1.37351600 | 0.48814200  | 0.00027900  |
| C | -1.14244700 | -0.90115800 | 0.00011700  |
| C | 1.37351900  | -0.48813800 | -0.00004000 |
| C | 1.14244900  | 0.90116400  | 0.00010000  |
| O | -0.43773700 | 2.67164100  | 0.00023900  |
| O | 0.43773700  | -2.67163600 | -0.00067800 |
| H | -2.83117900 | 2.05326100  | 0.00051500  |
| H | -4.37662300 | -1.96678400 | 0.00009600  |

## ARTICLE

## Journal Name

|   |             |             |             |
|---|-------------|-------------|-------------|
| H | -2.04800300 | -2.84508600 | -0.00004200 |
| H | 2.83117900  | -2.05325700 | -0.00081000 |
| H | 4.37662400  | 1.96678800  | -0.00134300 |
| H | 2.04800500  | 2.84509000  | -0.00044200 |
| C | -5.19789000 | 0.63348500  | -0.00021800 |
| H | -5.74877000 | 0.27820000  | 0.87979800  |
| H | -5.22249900 | 1.72753200  | 0.00462700  |
| H | -5.74504100 | 0.28628400  | -0.88581500 |
| C | 5.19788300  | -0.63350500 | 0.00097800  |
| H | 5.73906300  | -0.29944200 | 0.89532800  |
| H | 5.22255800  | -1.72737100 | -0.01945800 |
| H | 5.75464100  | -0.26532300 | -0.86991400 |

(e) D-A pair (resorcinol as D and anthraquinone as R)

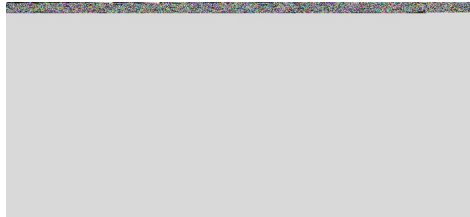

|   |             |             |             |
|---|-------------|-------------|-------------|
| C | 1.04288400  | 0.65796100  | -1.33934600 |
| C | 0.06797100  | -0.33702000 | -1.22917700 |
| C | -1.18754300 | -0.05773500 | -0.67691400 |
| C | -1.48352900 | 1.24504500  | -0.22574300 |
| C | -0.50817600 | 2.24509300  | -0.33583100 |
| C | 0.73698300  | 1.95180800  | -0.88281400 |
| C | -2.19198200 | -1.15571400 | -0.57368600 |
| C | -2.80912500 | 1.58074100  | 0.36215200  |
| C | -3.81862600 | 0.48394000  | 0.45955000  |
| C | -3.52438800 | -0.82056300 | 0.01263500  |
| C | -4.49448400 | -1.82605500 | 0.11817500  |
| H | -4.24716500 | -2.82320700 | -0.23220100 |
| C | -5.74522000 | -1.53925700 | 0.66246600  |
| C | -6.03738600 | -0.24271400 | 1.10704200  |
| C | -5.07807200 | 0.76349300  | 1.00586000  |
| H | 0.27742700  | -1.34856100 | -1.55938100 |
| H | -0.74757700 | 3.24491900  | 0.01262800  |
| H | 1.48837700  | 2.73493300  | -0.95765400 |
| H | -6.49392000 | -2.32311800 | 0.74138100  |
| H | -7.01283300 | -0.01995300 | 1.53140800  |
| H | -5.28305100 | 1.77441100  | 1.34390400  |
| O | -3.06768200 | 2.71668100  | 0.75364200  |
| O | -1.93621900 | -2.29537700 | -0.95436600 |
| C | 2.41932400  | 0.34923600  | -1.90557400 |
| H | 2.35726400  | -0.53760400 | -2.54523800 |
| H | 2.74511200  | 1.18347500  | -2.53837000 |



|   |            |             |             |
|---|------------|-------------|-------------|
| C | 3.45194200 | 0.12860100  | -0.81612800 |
| C | 4.36002000 | 1.12080800  | -0.44158800 |
| C | 3.50364700 | -1.09189400 | -0.11648200 |
| C | 5.28773000 | 0.93476700  | 0.58749600  |
| H | 4.34620700 | 2.07100700  | -0.97104200 |
| C | 4.41975600 | -1.30478300 | 0.91361700  |
| C | 5.31002700 | -0.28680100 | 1.26591000  |
| H | 5.98352300 | 1.72764800  | 0.85282400  |
| H | 4.45706500 | -2.24965600 | 1.44989500  |
| O | 2.61209100 | -2.05983500 | -0.50321800 |
| H | 2.71309400 | -2.85155300 | 0.04710800  |
| O | 6.18387700 | -0.55982000 | 2.28681300  |
| H | 6.74942500 | 0.21034200  | 2.45204800  |

(f) D-A pair (quinoidal form of resorcinol as D and anthraquinone as R)

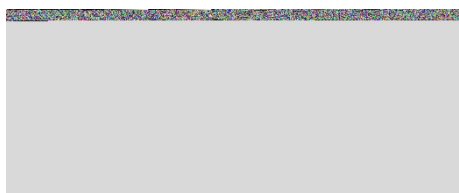

|   |             |             |             |
|---|-------------|-------------|-------------|
| C | -0.15167100 | 1.00384600  | -0.17536100 |
| C | 0.96790700  | 0.20054400  | -0.45447300 |
| C | 0.75411400  | -1.16689500 | -0.74161100 |
| C | -0.52376400 | -1.71152800 | -0.70206100 |
| C | -5.42692500 | -1.17704100 | 0.04202100  |
| C | -6.51782000 | -0.36501200 | 0.34779500  |
| C | -6.32873500 | 0.99973100  | 0.60419400  |
| C | -5.04902600 | 1.54981100  | 0.55416500  |
| C | -2.58887800 | 1.35609300  | 0.20139400  |
| C | -2.98786200 | -1.52490300 | -0.34104400 |
| C | -1.43625100 | 0.46030900  | -0.12153400 |
| C | -1.62883600 | -0.91167000 | -0.38140000 |
| C | -4.13694100 | -0.63292600 | -0.01038800 |
| C | -3.94658400 | 0.74112000  | 0.24777100  |
| O | -2.41941900 | 2.55192800  | 0.41923600  |
| O | -3.15067300 | -2.72021100 | -0.57053500 |
| H | -0.03283300 | 2.06555200  | 0.02112100  |
| H | 1.59174900  | -1.79038600 | -1.03715700 |
| H | -0.69061800 | -2.75978800 | -0.92910400 |
| H | -5.55169400 | -2.23616300 | -0.16000700 |
| H | -7.51608700 | -0.79252700 | 0.38716800  |
| H | -7.18018100 | 1.63146600  | 0.84250600  |
| H | -4.88078400 | 2.60420100  | 0.74929900  |
| C | 2.28694200  | 0.83449100  | -0.49764400 |
| H | 2.29016400  | 1.85461600  | -0.87346000 |
| C | 3.49130700  | 0.31777700  | -0.11119700 |

## ARTICLE

## Journal Name

|   |            |             |             |
|---|------------|-------------|-------------|
| C | 3.65771500 | -0.95415800 | 0.58711100  |
| C | 4.72127200 | 1.08689000  | -0.35470500 |
| C | 4.87029900 | -1.43252400 | 0.93847600  |
| H | 2.76202800 | -1.49823900 | 0.86695200  |
| C | 5.94681500 | 0.60617900  | -0.02292500 |
| C | 6.11211800 | -0.69232500 | 0.63146100  |
| H | 4.98544200 | -2.36600900 | 1.48117200  |
| H | 6.85551200 | 1.16582400  | -0.23229300 |
| O | 7.22342900 | -1.14175500 | 0.93075300  |
| O | 4.53061800 | 2.29239900  | -0.96274700 |
| H | 5.38447700 | 2.73572400  | -1.09009200 |

(g) D-A pair (biquinoidal form of resorcinol as D and anthraquinone as R)

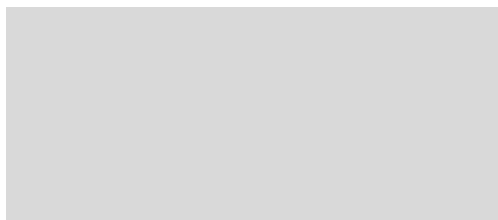

|   |             |             |             |
|---|-------------|-------------|-------------|
| C | 0.65713900  | -1.11403400 | -0.11104500 |
| C | -0.47836700 | -0.36991300 | -0.47682700 |
| C | -0.29419900 | 0.96750700  | -0.89593700 |
| C | 0.96986800  | 1.54453600  | -0.90282800 |
| C | 5.87734800  | 1.20744500  | -0.07756400 |
| C | 6.98474700  | 0.45646100  | 0.31301300  |
| C | 6.82591700  | -0.88029900 | 0.70276300  |
| C | 5.55995000  | -1.46348100 | 0.70113500  |
| C | 3.09855400  | -1.36555700 | 0.31849600  |
| C | 3.43372300  | 1.45600200  | -0.50596700 |
| C | 1.92781600  | -0.53575500 | -0.10169500 |
| C | 2.09033900  | 0.80782100  | -0.49572000 |
| C | 4.60101400  | 0.62958300  | -0.08254200 |
| C | 4.44112800  | -0.71619200 | 0.31002800  |
| O | 2.95550700  | -2.53621100 | 0.65718400  |
| O | 3.56924100  | 2.62722800  | -0.84954100 |
| H | 0.56102300  | -2.15391000 | 0.18780900  |
| H | -1.14356800 | 1.53879500  | -1.25675900 |
| H | 1.11432000  | 2.56875800  | -1.23202000 |
| H | 5.97859500  | 2.24401100  | -0.38317500 |
| H | 7.97235400  | 0.90977100  | 0.31476000  |
| H | 7.69020000  | -1.46453900 | 1.00694100  |
| H | 5.41510600  | -2.49703200 | 0.99933000  |
| C | -1.78237200 | -1.03354400 | -0.45776000 |
| H | -1.77626400 | -2.09220700 | -0.71368500 |
| C | -3.00336800 | -0.51595500 | -0.14336900 |
| C | -3.22842500 | 0.81638600  | 0.39257700  |

|   |             |             |             |
|---|-------------|-------------|-------------|
| C | -4.19113400 | -1.42279900 | -0.31530400 |
| C | -4.44338200 | 1.36725000  | 0.64664600  |
| H | -2.34533000 | 1.39804800  | 0.64430900  |
| C | -5.54318800 | -0.80783100 | -0.11740100 |
| O | -4.06491100 | -2.60227300 | -0.62501300 |
| C | -5.68235100 | 0.60841300  | 0.36149500  |
| C | -4.61336100 | 2.74152500  | 1.22833500  |
| C | -6.64573500 | -1.53385400 | -0.37464200 |
| O | -6.78775200 | 1.11776600  | 0.53736600  |
| H | -5.20355000 | 3.37411900  | 0.55480700  |
| H | -5.17250900 | 2.69655300  | 2.17056100  |
| H | -3.64627800 | 3.22022200  | 1.41138200  |
| H | -6.56000600 | -2.56075200 | -0.71684900 |
| H | -7.63072500 | -1.09621000 | -0.24269600 |

(g) D-A dimer (resorcinol as D and anthraquinone as R)

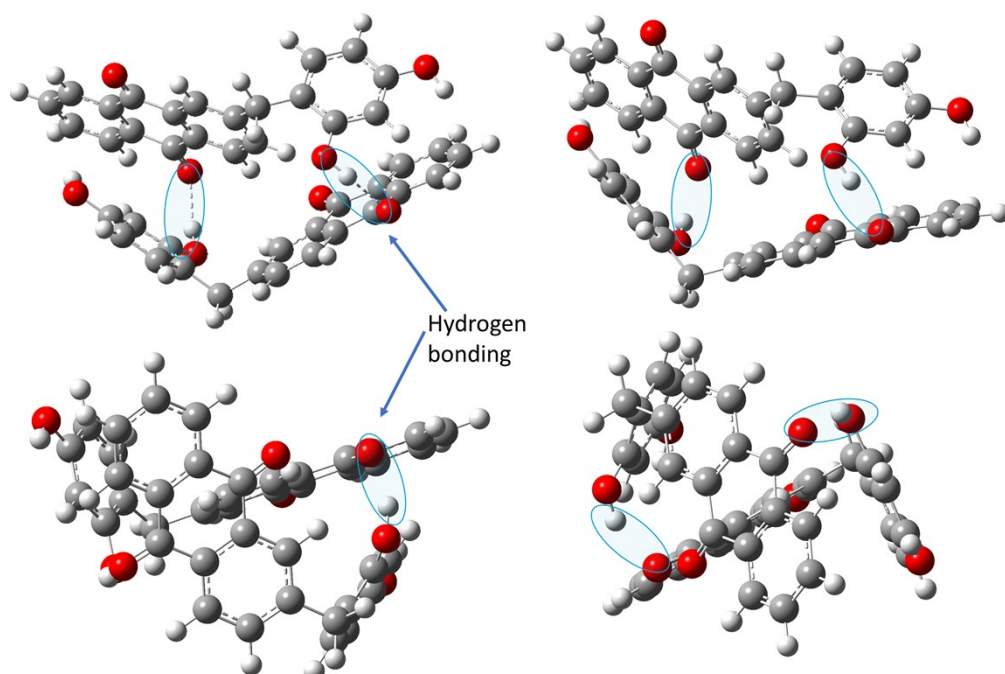

|   |             |             |             |
|---|-------------|-------------|-------------|
| C | -0.32404100 | -3.37295100 | -0.62885900 |
| C | -0.71457600 | -2.69965100 | 0.53697000  |
| C | -1.95883600 | -2.07133800 | 0.62083200  |
| C | -2.84560000 | -2.10925500 | -0.47803600 |
| C | -2.44622500 | -2.75575700 | -1.65378300 |
| C | -1.20261500 | -3.37777300 | -1.72437900 |
| C | -2.32028800 | -1.33476200 | 1.86514900  |
| C | -4.18211300 | -1.48036300 | -0.40579000 |
| C | -4.61746800 | -0.91410100 | 0.89816600  |
| C | -3.71290400 | -0.80458400 | 1.97330200  |
| C | -4.12009500 | -0.18722400 | 3.16249600  |
| H | -3.40245600 | -0.09708300 | 3.97183000  |

## ARTICLE

## Journal Name

|   |             |             |             |
|---|-------------|-------------|-------------|
| C | -5.42176500 | 0.29407400  | 3.29207700  |
| C | -6.33015900 | 0.15969600  | 2.23330300  |
| C | -5.92703300 | -0.43537700 | 1.03988500  |
| H | -0.04350100 | -2.66401900 | 1.38836600  |
| H | -3.12603800 | -2.77611000 | -2.49943100 |
| H | -0.91202200 | -3.88857300 | -2.63940000 |
| H | -5.73285400 | 0.77174100  | 4.21698500  |
| H | -7.34862400 | 0.52312100  | 2.34339900  |
| H | -6.61211300 | -0.54430600 | 0.20438600  |
| O | -4.91147700 | -1.39833100 | -1.40317600 |
| O | -1.50488600 | -1.16480700 | 2.76749700  |
| C | 1.01411800  | -4.08445500 | -0.70306100 |
| H | 1.16891900  | -4.64231100 | 0.22655600  |
| H | 0.98135000  | -4.81812600 | -1.51690500 |
| C | 2.19528800  | -3.15630800 | -0.93033100 |
| C | 2.64793400  | -2.84791300 | -2.21924000 |
| C | 2.88157200  | -2.58551900 | 0.15382500  |
| C | 3.73491200  | -2.00519900 | -2.45020500 |
| H | 2.12471400  | -3.27569800 | -3.07220900 |
| C | 4.02182600  | -1.79947500 | -0.05404100 |
| C | 4.42635000  | -1.48362200 | -1.35319400 |
| H | 4.05999000  | -1.75625400 | -3.45499700 |
| H | 4.59055000  | -1.44568200 | 0.79959500  |
| O | 2.41790500  | -2.84011100 | 1.41737200  |
| H | 2.62447100  | -2.08512800 | 2.00589000  |
| O | 5.50112400  | -0.67034900 | -1.60545300 |
| H | 5.82325900  | -0.27125400 | -0.78123900 |
| C | -3.35185800 | 1.51627000  | -1.97234700 |
| C | -4.57330900 | 1.77182100  | -1.33293200 |
| C | -2.25053100 | 2.36604700  | -1.78432300 |
| C | -4.69765000 | 2.87168800  | -0.48336200 |
| H | -5.40909800 | 1.09524000  | -1.48962200 |
| C | -2.42261900 | 3.47757200  | -0.94795600 |
| C | -3.62227400 | 3.74500500  | -0.29357400 |
| H | -1.57424600 | 4.13964200  | -0.78666300 |
| H | -3.73582000 | 4.59977700  | 0.36502200  |
| C | -0.89597900 | 2.05793800  | -2.39007500 |
| C | 0.14389300  | 1.68319700  | -1.34703100 |
| H | -0.53095100 | 2.92042800  | -2.96140700 |
| C | 1.45320400  | 2.16522400  | -1.43384900 |
| C | -0.18794100 | 0.84271400  | -0.27019700 |
| C | 2.41261200  | 1.82935500  | -0.47400400 |
| H | 1.75028600  | 2.81693200  | -2.25061700 |
| C | 0.75262600  | 0.49486300  | 0.69217000  |
| H | -1.20314700 | 0.46872700  | -0.18865900 |
| C | 2.06292900  | 0.98663300  | 0.60355900  |

|   |             |             |             |
|---|-------------|-------------|-------------|
| C | 3.79070300  | 2.37543200  | -0.61362200 |
| H | 0.48108800  | -0.14821900 | 1.52336600  |
| C | 3.06143300  | 0.58942300  | 1.61710900  |
| C | 4.79224600  | 1.99222200  | 0.42936700  |
| O | 4.10218900  | 3.11857700  | -1.53883600 |
| C | 4.43211500  | 1.17044100  | 1.51604300  |
| O | 2.80124800  | -0.23208600 | 2.50475500  |
| C | 6.10814900  | 2.46014100  | 0.31822400  |
| C | 5.38957800  | 0.83930900  | 2.48499600  |
| H | 6.36470000  | 3.08420400  | -0.53208700 |
| C | 7.05691200  | 2.12019800  | 1.28258900  |
| C | 6.69529300  | 1.31451500  | 2.37126400  |
| H | 5.09223800  | 0.20415300  | 3.31353200  |
| H | 8.07677400  | 2.48360100  | 1.18970100  |
| H | 7.43346900  | 1.05480500  | 3.12520200  |
| H | -0.99459500 | 1.23174400  | -3.10297500 |
| O | -5.86219700 | 3.14238600  | 0.19124900  |
| H | -6.48802900 | 2.41253200  | 0.06487600  |
| O | -3.19650000 | 0.43217700  | -2.79505800 |
| H | -3.92445000 | -0.20243900 | -2.65212100 |

(h) D-A dimer (quinoidal resorcinol as D and anthraquinone as R)

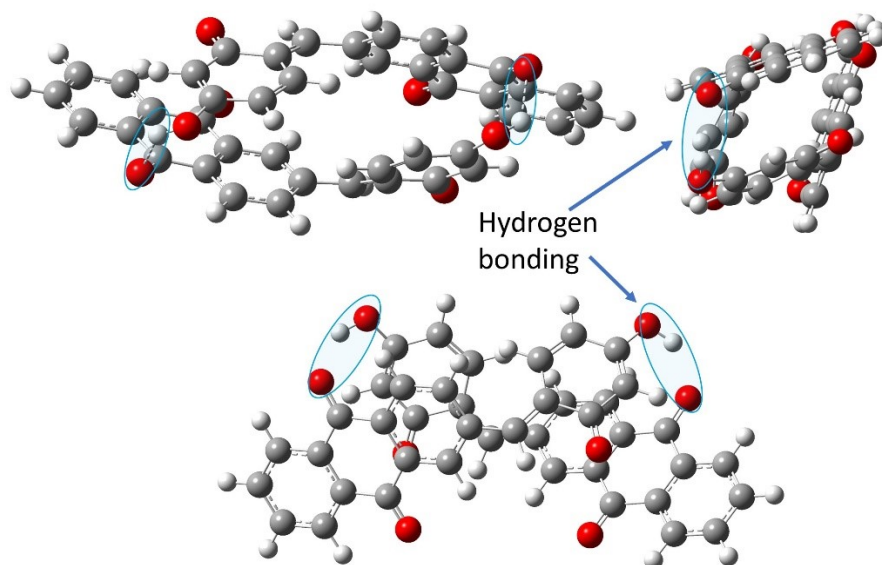

|   |            |             |             |
|---|------------|-------------|-------------|
| C | 1.46153800 | -1.04249100 | -1.38556300 |
| C | 0.77960800 | 0.03416700  | -1.97710100 |
| C | 1.53329100 | 1.14120700  | -2.42535900 |
| C | 2.90464500 | 1.19883900  | -2.21255400 |
| C | 7.05104700 | -0.76830300 | -0.27036100 |
| C | 7.69651800 | -1.81612500 | 0.38240100  |
| C | 6.97497500 | -2.95506400 | 0.76504600  |
| C | 5.61210900 | -3.04637800 | 0.48895700  |

## ARTICLE

## Journal Name

|   |             |             |             |
|---|-------------|-------------|-------------|
| C | 3.49820000  | -2.12460300 | -0.44927400 |
| C | 5.00819100  | 0.29595700  | -1.21408500 |
| C | 2.83467000  | -0.98184300 | -1.14821100 |
| C | 3.56399300  | 0.15694800  | -1.54538000 |
| C | 5.68000800  | -0.85133800 | -0.55184200 |
| C | 4.95692700  | -2.00144800 | -0.17138100 |
| O | 2.86374100  | -3.12540200 | -0.13557000 |
| O | 5.61503900  | 1.34701000  | -1.44848200 |
| H | 0.91966600  | -1.92657000 | -1.06206300 |
| H | 1.03746800  | 1.94760400  | -2.95662500 |
| H | 3.48287400  | 2.05859800  | -2.53560000 |
| H | 7.59165200  | 0.12357800  | -0.57126800 |
| H | 8.75952800  | -1.74741500 | 0.59719300  |
| H | 7.47744000  | -3.76830200 | 1.28174300  |
| H | 5.03306100  | -3.91486900 | 0.78550000  |
| C | -0.67770900 | -0.04934000 | -2.06875100 |
| H | -1.09060100 | -1.03598800 | -2.27971900 |
| C | -1.59950900 | 0.92220700  | -1.81354400 |
| C | -1.28492400 | 2.25018300  | -1.31351500 |
| C | -3.05679200 | 0.52200500  | -1.91335400 |
| C | -2.25213800 | 3.07946800  | -0.85531700 |
| H | -0.24689000 | 2.55200500  | -1.23655100 |
| C | -4.03064300 | 1.47474300  | -1.42121500 |
| C | -3.63861200 | 2.65275900  | -0.85071400 |
| H | -2.02256600 | 4.04723600  | -0.42034800 |
| H | -5.07257400 | 1.17364300  | -1.44805400 |
| O | -4.47494800 | 3.48976300  | -0.19622900 |
| H | -5.25964200 | 2.99783700  | 0.11632100  |
| O | -3.39142200 | -0.59029000 | -2.34294800 |
| H | 5.26002700  | 2.99800400  | -0.11519000 |
| O | 4.47506900  | 3.48963300  | 0.19715100  |
| C | 3.63872800  | 2.65239500  | 0.85132400  |
| C | 2.25223400  | 3.07904500  | 0.85587000  |
| C | 4.03075100  | 1.47426700  | 1.42159300  |
| C | 1.28500900  | 2.24962700  | 1.31380200  |
| H | 2.02266600  | 4.04690300  | 0.42110100  |
| C | 3.05688600  | 0.52136400  | 1.91338600  |
| H | 5.07269200  | 1.17320700  | 1.44849600  |
| C | 1.59959700  | 0.92155000  | 1.81354600  |
| H | 0.24696500  | 2.55142400  | 1.23682300  |
| O | 3.39151600  | -0.59103400 | 2.34270900  |
| C | 0.67777500  | -0.05003000 | 2.06852100  |
| C | -0.77953100 | 0.03360000  | 1.97685400  |
| H | 1.09061600  | -1.03672700 | 2.27936100  |
| C | -1.46157100 | -1.04294800 | 1.38523800  |
| C | -1.53309000 | 1.14069600  | 2.42517600  |

|   |             |             |             |
|---|-------------|-------------|-------------|
| C | -2.83470700 | -0.98215900 | 1.14794500  |
| H | -0.91979000 | -1.92705700 | 1.06167000  |
| C | -2.90444700 | 1.19846400  | 2.21242900  |
| H | -1.03716300 | 1.94702400  | 2.95645200  |
| C | -3.49838400 | -2.12483300 | 0.44900700  |
| C | -3.56391600 | 0.15667000  | 1.54521900  |
| H | -3.48257900 | 2.05826700  | 2.53553200  |
| C | -4.95711500 | -2.00152900 | 0.17118800  |
| O | -2.86402000 | -3.12564500 | 0.13515500  |
| C | -5.00810400 | 0.29583900  | 1.21395800  |
| C | -5.61242900 | -3.04636700 | -0.48916300 |
| C | -5.68007300 | -0.85137000 | 0.55173700  |
| O | -5.61487900 | 1.34689600  | 1.44856400  |
| C | -6.97530600 | -2.95492400 | -0.76515600 |
| H | -5.03347500 | -3.91489600 | -0.78578000 |
| C | -7.05112600 | -0.76820600 | 0.27036000  |
| C | -7.69672900 | -1.81594200 | -0.38240800 |
| H | -7.47787500 | -3.76809500 | -1.28185600 |
| H | -7.59163100 | 0.12371100  | 0.57133700  |
| H | -8.75974600 | -1.74713100 | -0.59712800 |

## S12 Notes and references

- S1 P. Celis-Salazar, C. Epley, S. Ahrenholtz, W. Maza, P. Usov, A. Morris, *Inorg. Chem.*, 2017, **56**, 13741–13747.
- S2 M. Um, J. Jang, J. Hong, J. Kang, D. Yoon, S. Lee, J.-J. Kim, J. Hong, *New J. Chem.*, 2008, **32**, 2006–2010
- S3 Y. Shiraishi, T. Takii, T. Hagi, S. Mori, Y. Kofuji, Y. Kitagawa, S. Tanaka, S. Ichikawa, T. Hirai, *Nat. Mater.*, 2019, **18**, 985–993.
- S4 Y. Shiraishi, S. Kanazawa, Y. Kofuji, H. Sakamoto, S. Ichikawa, S. Tanaka, T. Hirai, *Angew. Chem. Int. Ed.*, 2014, **53**, 13454–13459.
- S5 Y. Shiraishi, T. Hagi, M. Matsumoto, S. Tanaka, S. Ichikawa, T. Hirai, *Commun Chem.*, 2020, **3**, 169.
- S6 H. Yan, M. Shen, Y. Shen, X. Wang, W. Lin, J. Pan, J. He, Y. Ye, X. Yang, F. Zhu, J. Xu, J. He, G. Ouyang, *Proc. Natl. Acad. Sci. U.S.A.*, 2022, **119**, e2202913119.
- S7 L. Liu, M.-Y. Gao, H. Yang, X. Wang, X. Li, A. Cooper, *J. Am. Chem. Soc.*, 2021, **143**, 19287–19293.
- S8 H. Yang, C. Li, T. Liu, T. Fellowes, S. Chong, L. Catalano, M. Bahri, W. Zhang, Y. Xu, L. Liu, W. Zhao, A. Gardner, R. Clowes, N. Browning, X. Li, A. Cowan, A. Cooper, *Nat. Nanotechnol.*, 2023, **18**, 307–315.
- S9 H. Cheng, H. Lv, J. Cheng, L. Wang, X. Wu, H. Xu, *Adv. Mater.* 2022, **34**, 2107480.
- S10 Q. Wu, J. Cao, X. Wang, Y. Liu, Y. Zhao, H. Wang, Y. Liu, H. Huang, F. Liao, M. Shao, Z. Kang, *Nat Commun*, 2021, **12**, 483..
- S11 Zhao, Y. Liu, Y.; Cao, J.; H. Wang; M. Shao; H. Huang, Y. Liu, Z. Kang, *Appl. Catal. B: Environ.*, 2020, **278**, 119289.
- S12 X. Xu, R. Sa, W. Huang, Y. Sui, W. Chen, G. Zhou, X. Li, Y. Li, H. Zhong, *ACS Catal.*, 2022, **12**, 12954–12963.
- S13 C. Yang, S. Wan, B. Zhu, J. Yu, S. Cao, *Angew Chem Int Ed*, 2022, **134**, e202208438
- S14 X. Xu, H. Zhong, W. Huang, Y. Sui, R. Sa, W. Chen, G. Zhou, X. Li, D. Li, M. Wen, B. Jiang, *Chem. Eng. J.*, 2023, **454**, 139929.
- S15 C. Zhao, X. Wang, Y. Yin, W. Tian, G. Zeng, H. Li, S. Ye, L. Wu, and J. Liu, *Angew. Chem. Int. Ed.*, 2023, **62**, e202218318.
